# Supplementary material for: π-Complexed polyfluoroarenes: a reactivity, bonding and spectroscopic study of (η6-C6F6)Cr(η6-C6H6) and related molecules
Source: Royal Society of Chemistry journal article supplement (doi:10.1039/c1nj20194h), 2011-01-01
Supplement: c1nj20194h.pdf [file c1nj20194h.pdf]

## $\pi$ -Complexed Polyfluoroarenes: A Reactivity, Bonding and Spectroscopic Study of $(\eta^6\text{-C}_6\text{F}_6)\text{Cr}(\eta^6\text{-C}_6\text{H}_6)$ and Related Molecules

Michael J. McGlinchey<sup>a\*</sup> and Ming Wah Wong<sup>b\*</sup>

<sup>a</sup> *School of Chemistry and Chemical Biology, University College Dublin, Belfield, Dublin 4, Ireland.*

<sup>b</sup> *Department of Chemistry, National University of Singapore, 3 Science Drive 3, Singapore 117543.*

**Cartesian coordinates and total energies (E, in hartrees) of the B3LYP/6-31G\* optimized geometries of all calculated structures.**

|                                                        |           |           |           |                                                        |           |           |           |
|--------------------------------------------------------|-----------|-----------|-----------|--------------------------------------------------------|-----------|-----------|-----------|
| <hr/>                                                  |           |           |           | <hr/>                                                  |           |           |           |
| <b>C<sub>6</sub>H<sub>6</sub> E = -232.243832</b>      |           |           |           | <b>C<sub>6</sub>F<sub>6</sub> E = -827.588048</b>      |           |           |           |
| C                                                      | 0.000000  | 0.000000  | 1.396639  | C                                                      | -0.161811 | 1.494325  | -0.000462 |
| C                                                      | 1.209525  | 0.000000  | 0.698319  | C                                                      | 1.232177  | 1.494226  | -0.000462 |
| C                                                      | 1.209525  | 0.000000  | -0.698319 | C                                                      | 1.929258  | 2.701405  | -0.000462 |
| C                                                      | 0.000000  | 0.000000  | -1.396639 | C                                                      | 1.232350  | 3.908684  | -0.000462 |
| C                                                      | -1.209525 | 0.000000  | -0.698319 | C                                                      | -0.161638 | 3.908783  | -0.000462 |
| C                                                      | -1.209525 | 0.000000  | 0.698319  | C                                                      | -0.858718 | 2.701604  | -0.000462 |
| H                                                      | 0.000000  | 0.000000  | 2.483620  | F                                                      | 1.900174  | 5.065198  | -0.000462 |
| H                                                      | 2.150878  | 0.000000  | 1.241810  | F                                                      | 3.264740  | 2.701309  | -0.000462 |
| H                                                      | 2.150878  | 0.000000  | -1.241810 | F                                                      | 1.899836  | 0.337616  | -0.000462 |
| H                                                      | 0.000000  | 0.000000  | -2.483620 | F                                                      | -0.829635 | 0.337811  | -0.000462 |
| H                                                      | -2.150878 | 0.000000  | -1.241810 | F                                                      | -2.194201 | 2.701700  | -0.000462 |
| H                                                      | -2.150878 | 0.000000  | 1.241810  | F                                                      | -0.829296 | 5.065393  | -0.000462 |
| <hr/>                                                  |           |           |           | <hr/>                                                  |           |           |           |
| <b>Cr(C<sub>6</sub>H<sub>6</sub>) E = -1276.518219</b> |           |           |           | <b>Cr(C<sub>6</sub>F<sub>6</sub>) E = -1871.855384</b> |           |           |           |
| Cr                                                     | 0.009566  | 0.004595  | 1.181109  | Cr                                                     | -0.001578 | 0.000365  | 0.811184  |
| H                                                      | 2.453300  | -0.706891 | 2.486659  | C                                                      | 1.333364  | 0.341597  | -0.688749 |
| C                                                      | 1.416302  | -0.395345 | 2.587519  | C                                                      | -1.414313 | -0.368929 | -0.608959 |
| C                                                      | -1.337191 | 0.429661  | 2.637959  | C                                                      | 0.339123  | 1.354245  | -0.671840 |
| C                                                      | 0.370991  | -1.381634 | 2.619115  | C                                                      | 0.953708  | -1.026131 | -0.665859 |
| C                                                      | 1.084862  | 1.003484  | 2.581002  | C                                                      | -0.419982 | -1.381658 | -0.625506 |
| C                                                      | -0.291796 | 1.415944  | 2.606420  | C                                                      | -1.034728 | 0.998661  | -0.632405 |
| C                                                      | -1.005827 | -0.969133 | 2.644129  | F                                                      | -0.776086 | -2.677623 | -0.449892 |

2

|   |           |           |          |   |           |           |           |
|---|-----------|-----------|----------|---|-----------|-----------|-----------|
| H | 0.619476  | -2.437505 | 2.540844 | F | -2.713572 | -0.704361 | -0.417966 |
| H | 1.871409  | 1.746857  | 2.473818 | F | -1.974680 | 1.961100  | -0.465935 |
| H | -0.543379 | 2.470290  | 2.518007 | F | 0.702459  | 2.653604  | -0.542441 |
| H | -1.796217 | -1.713799 | 2.585141 | F | 2.641164  | 0.679044  | -0.575761 |
| H | -2.377400 | 0.740497  | 2.575151 | F | 1.902416  | -1.984944 | -0.531172 |

---

**Cr(C<sub>6</sub>H<sub>6</sub>)<sub>2</sub> E = -1508.891147**

|    |           |           |           |
|----|-----------|-----------|-----------|
| Cr | 0.000308  | 0.002020  | 0.998438  |
| C  | 1.203790  | 0.670409  | -0.658883 |
| C  | -1.281965 | -0.697981 | -0.585111 |
| C  | -0.010236 | 1.405174  | -0.636525 |
| C  | 1.174951  | -0.748507 | -0.644439 |
| C  | -0.067935 | -1.432755 | -0.607433 |
| C  | -1.253130 | 0.720931  | -0.599750 |
| H  | 2.182981  | -1.276430 | 2.543258  |
| C  | 1.254579  | -0.715530 | 2.596586  |
| C  | -1.175276 | 0.750966  | 2.641379  |
| C  | 0.012536  | -1.401306 | 2.633262  |
| C  | 1.281676  | 0.703420  | 2.582081  |
| C  | 0.066767  | 1.436731  | 2.604462  |
| C  | -1.202377 | -0.667986 | 2.655679  |
| H  | -0.009015 | -2.486747 | 2.607134  |
| H  | 2.230716  | 1.227384  | 2.517600  |
| H  | 0.086500  | 2.521454  | 2.556329  |
| H  | -2.153179 | -1.192658 | 2.647462  |
| H  | -2.105383 | 1.311251  | 2.622330  |
| H  | 0.012600  | 2.490593  | -0.610524 |
| H  | 2.155226  | 1.193931  | -0.650722 |
| H  | 2.104364  | -1.309942 | -0.625350 |
| H  | -0.088981 | -2.517448 | -0.559177 |
| H  | -2.231629 | -1.220797 | -0.520509 |
| H  | -2.180733 | 1.283157  | -0.546496 |

---

**Cr(C<sub>6</sub>H<sub>6</sub>)<sub>2</sub><sup>+</sup> E = -1508.706667**

|    |           |           |           |
|----|-----------|-----------|-----------|
| Cr | 0.000199  | 0.002207  | 0.998434  |
| C  | 1.201990  | 0.672163  | -0.676426 |
| C  | -1.280917 | -0.699989 | -0.602788 |
| C  | -0.013006 | 1.404939  | -0.654446 |
| C  | 1.175531  | -0.746644 | -0.662490 |
| C  | -0.065966 | -1.432736 | -0.625138 |
| C  | -1.254460 | 0.718862  | -0.618195 |
| H  | 2.178665  | -1.279202 | 2.551063  |
| C  | 1.253793  | -0.717022 | 2.614606  |
| C  | -1.173463 | 0.752967  | 2.659773  |
| C  | 0.010848  | -1.400715 | 2.650919  |
| C  | 1.283018  | 0.701645  | 2.599674  |
| C  | 0.069380  | 1.436620  | 2.622352  |
| C  | -1.202758 | -0.665775 | 2.673376  |
| H  | -0.012729 | -2.484028 | 2.614827  |
| H  | 2.230845  | 1.222528  | 2.523991  |
| H  | 0.090597  | 2.519031  | 2.564431  |
| H  | -2.152871 | -1.187627 | 2.653991  |
| H  | -2.101054 | 1.313515  | 2.630657  |
| H  | 0.008151  | 2.488308  | -0.618547 |
| H  | 2.151014  | 1.195986  | -0.656969 |
| H  | 2.104208  | -1.305364 | -0.633078 |
| H  | -0.084922 | -2.515178 | -0.566895 |
| H  | -2.227606 | -1.222936 | -0.527155 |
| H  | -2.181331 | 1.277779  | -0.554887 |

---

**(C<sub>6</sub>F<sub>6</sub>)Cr(C<sub>6</sub>H<sub>6</sub>) E = -2104.243624**

|    |           |           |           |
|----|-----------|-----------|-----------|
| Cr | 0.000947  | 0.002563  | 0.979156  |
| C  | 1.329420  | 0.336422  | -0.636104 |
| C  | -1.406657 | -0.363256 | -0.560481 |
| C  | 0.342036  | 1.346418  | -0.621901 |
| C  | 0.948721  | -1.023520 | -0.613432 |
| C  | -0.419194 | -1.373156 | -0.575640 |
| C  | -1.025986 | 0.996755  | -0.583461 |

---

**(C<sub>6</sub>F<sub>6</sub>)Cr(C<sub>6</sub>H<sub>6</sub>)<sup>+</sup> E = -2104.005737**

|    |           |           |           |
|----|-----------|-----------|-----------|
| Cr | 0.003633  | 0.002552  | 1.025644  |
| C  | 1.333470  | 0.339833  | -0.682973 |
| C  | -1.412945 | -0.367441 | -0.603983 |
| C  | 0.340351  | 1.352903  | -0.665849 |
| C  | 0.953310  | -1.026578 | -0.660191 |
| C  | -0.419802 | -1.380437 | -0.618837 |
| C  | -1.032806 | 0.999005  | -0.627354 |

|   |           |           |           |   |           |           |           |
|---|-----------|-----------|-----------|---|-----------|-----------|-----------|
| H | 2.436467  | -0.693967 | 2.511469  | H | 2.437695  | -0.698596 | 2.551416  |
| C | 1.399105  | -0.385579 | 2.584069  | C | 1.400990  | -0.388295 | 2.627872  |
| C | -1.320198 | 0.420573  | 2.640366  | C | -1.320261 | 0.424091  | 2.680638  |
| C | 0.370503  | -1.361844 | 2.615500  | C | 0.369199  | -1.363919 | 2.659301  |
| C | 1.068122  | 0.993706  | 2.579392  | C | 1.072354  | 0.993447  | 2.621554  |
| C | -0.291559 | 1.396903  | 2.606916  | C | -0.288474 | 1.399681  | 2.648050  |
| C | -0.989243 | -0.958782 | 2.644388  | C | -0.991684 | -0.957698 | 2.685724  |
| H | 0.621998  | -2.415751 | 2.565995  | H | 0.618942  | -2.418247 | 2.607016  |
| H | 1.852843  | 1.738592  | 2.502745  | H | 1.858293  | 1.736779  | 2.541173  |
| H | -0.545636 | 2.449910  | 2.551131  | H | -0.540718 | 2.452959  | 2.587072  |
| H | -1.776507 | -1.704372 | 2.616718  | H | -1.780062 | -1.702127 | 2.654296  |
| H | -2.359899 | 0.728182  | 2.610093  | H | -2.359384 | 0.733459  | 2.643728  |
| F | -0.781378 | -2.669792 | -0.523788 | F | -0.773627 | -2.654768 | -0.567632 |
| F | -2.710196 | -0.697762 | -0.496339 | F | -2.693105 | -0.697087 | -0.538163 |
| F | -1.966465 | 1.960611  | -0.541666 | F | -1.958215 | 1.944153  | -0.581748 |
| F | 0.706175  | 2.643507  | -0.617142 | F | 0.695864  | 2.627784  | -0.658610 |
| F | 2.634424  | 0.670873  | -0.647393 | F | 2.615142  | 0.670078  | -0.691235 |
| F | 1.890158  | -1.987233 | -0.600260 | F | 1.879841  | -1.971530 | -0.646579 |

---
